# Supplementary material for: Development and Validation of a Clinical Prediction Model for Venous Thromboembolism Following Neurosurgery: A 6-Year, Multicenter, Retrospective and Prospective Diagnostic Cohort Study
Source: MDPI journal article supplement (doi:10.3390/cancers15225483), 2023-11-20
Supplement: s1 [file s1]

## **Supplementary Material S1 Content**

**Figure S1** Flowcharts (a) Flowcharts for the development cohort and retrospective internal validation cohort. (b) Flowchart for the prospective internal validation cohort. (c) Flowchart for the external validation cohort.

**Figure S2** Graphical representation of the variables' contribution to the three axis of the PCA

**Table S1** Details of the reagents used

**Table S2** A comprehensive description of the surgical indications for all patients in each neurosurgery cohort

**Table S3** In the entire retrospective cohort, univariable logistic regression was utilized to calculate the odds ratios (ORs) representing the correlation between various types of neurosurgical procedures and the occurrence of postoperative VTE

**Text S1** Content of Bundled Care

**Figure S1 Flowcharts (a) Flowcharts for the development cohort and retrospective internal validation cohort. (b) Flowchart for the prospective internal validation cohort. (c) Flowchart for the external validation cohort.**

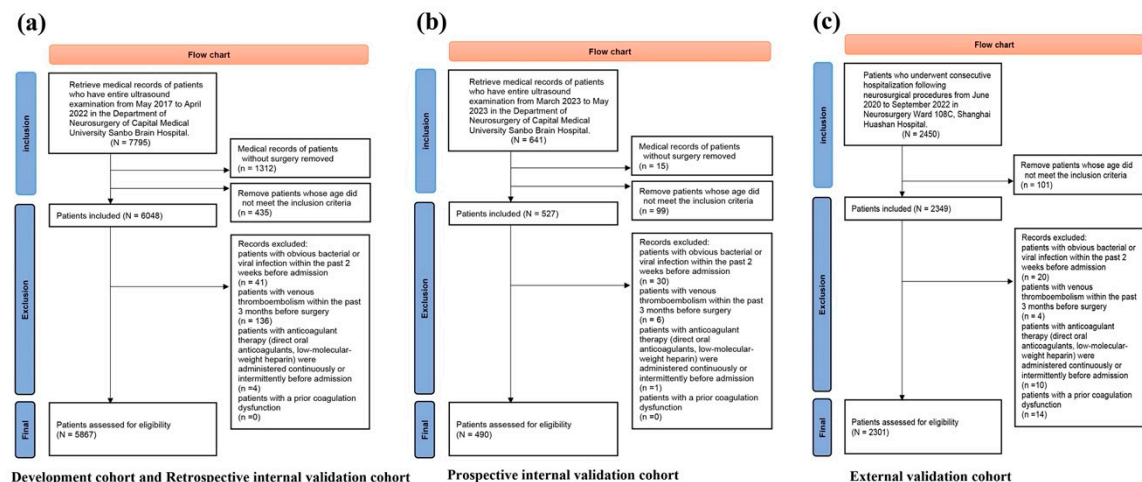

**Figure S2 Graphical representation of the variables' contribution to the three axis of the PCA**

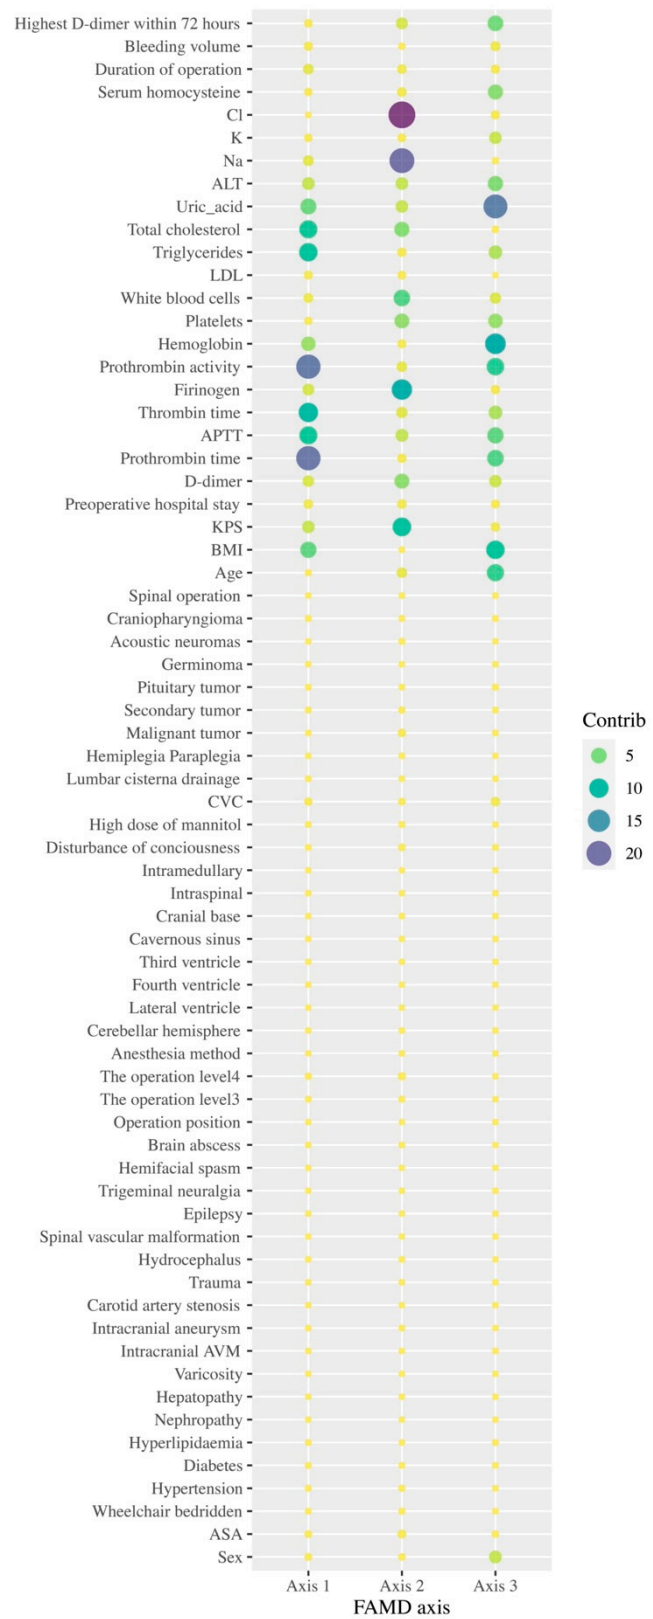

**Table S1 Details of the reagents used**

| Laboratory test items        | English names of reagent     | Reagent detection method | Company | Company's country |
|------------------------------|------------------------------|--------------------------|---------|-------------------|
| D-dimer (ug/mL) <sup>a</sup> | INNOVANCE D-Dimer            | Immunoassay method       | Sysmex  | Japan             |
| Prothrombin time (s)         | Thromborel S                 | Clotting method          | Sysmex  | Japan             |
| APTT (s) <sup>a</sup>        | Dade Actin FSL Activated PTT | Clotting method          | Sysmex  | Japan             |
| Thrombin time (s)            | Test Thrombin                | Clotting method          | Sysmex  | Japan             |
| Fibrinogen (g/L)             | Dade Thrombin                | Clotting method          | Sysmex  | Japan             |
| Prothrombin activity (%)     | Thromborel activity          | Clotting method          | Sysmex  | Japan             |
| Hemoglobin (g/L)             | hemoglobin                   | Colorimetry method       | Mindray | China             |
| Platelets (109/L)            | platelet                     | Impedance method         | Mindray | China             |
| White blood cells (109/L)    | leukocyte                    | Impedance method         | Mindray | China             |
| LDL (mmol/L)                 | LDL-Cholesterol              | End-point method         | Beckman | America           |
| Triglycerides (mmol/L)       | Triglyceride                 | End-point method         | Beckman | America           |
| Total cholesterol (mmol/L)   | Cholesterol                  | End-point method         | Beckman | America           |
| Uric acid (μmol/L)           | Uric Acid                    | Uricase method           | Leadman | China             |
| ALT (U/L)                    | Alanine Aminotransferase     | Rate method              | Beckman | America           |
| Na (mmol/L)                  | Sodium                       | ISE method-indirect      | Beckman | America           |
| K (mmol/L)                   | Potassium                    | ISE method-indirect      | Beckman | America           |
| Cl (mmol/L)                  | Chlorine                     | ISE method-indirect      | Beckman | America           |
| Serum homocysteine (umol/L)  | Homocysteine                 | Cyclic enzymatic method  | Leadman | China             |

<sup>a</sup>Shanghai Huashan Hospital used the same reagents as Beijing Sanbo brain Hospital.

**Table S2 A comprehensive description of the surgical indications for all patients in each neurosurgery cohort**

| The indications for all neurosurgical patients in each cohort                                                        | Development cohort (n=4401) | Retrospective internal validation cohort (n=1466) | Prospective internal validation cohort (n=490) | External validation cohort (n=2301) |
|----------------------------------------------------------------------------------------------------------------------|-----------------------------|---------------------------------------------------|------------------------------------------------|-------------------------------------|
| Neuro-oncology (brain)                                                                                               | 2258 (51.3%)                | 891 (60.8%)                                       | 289 (59.0%)                                    | 2271 (98.7%)                        |
| Cerebrovascular neurosurgery for aneurysms, arteriovenous malformations (AVMs), stroke, and other related conditions | 1203 (20.5%)                | 262 (17.9%)                                       | 83 (16.9%)                                     | NA                                  |
| Functional and epilepsy neurosurgery, trigeminal neuralgia and nerve compression syndromes                           | 490 (11.1%)                 | 107 (7.3%)                                        | 28 (5.7%)                                      | NA                                  |
| Spinal neurosurgery                                                                                                  | 591 (13.4%)                 | 146 (10.0%)                                       | 39 (8.0%)                                      | NA                                  |
| Other neurosurgery                                                                                                   | 160 (3.64%)                 | 60 (4.1%)                                         | 51 (10.4%)                                     | 30 (1.3%)                           |

**Table S3 In the entire retrospective cohort, univariable logistic regression was utilized to calculate the odds ratios (ORs) representing the correlation between various types of neurosurgical procedures and the occurrence of postoperative VTE.**

| The indications for all neurosurgical patients in the entire retrospective cohort                                    | Univariable LR      |          |
|----------------------------------------------------------------------------------------------------------------------|---------------------|----------|
|                                                                                                                      | OR (95% CI)         | P value* |
| Neuro-oncology (brain)                                                                                               | 1.037 (0.898-1.197) | 0.622    |
| Cerebrovascular neurosurgery for aneurysms, arteriovenous malformations (AVMs), stroke, and other related conditions | 1.596 (1.261-2.019) | <0.001   |
| Functional and epilepsy neurosurgery, trigeminal neuralgia and nerve compression syndromes                           | 1.011 (0.727-1.405) | 0.950    |
| Spinal neurosurgery                                                                                                  | 0.722 (0.567-0.919) | 0.008    |

\*P value<0.05 was considered statistical significance.

**Text S1 Content of Bundled Care**

Basic prophylaxis should recommend adopting bundled care, including: (1) establishment of a bundled care team; (2) assessment of DVT risk in patients; (3) psychological guidance; (4) health education primarily pre-operation, with continual reinforcement post-operation. Patients are guided on in-bed hygiene practices, emphasizing the importance of early ambulation in VTE prophylaxis, encouraged to exercise post-operation, such as elevating legs, maintaining fluid balance, avoiding dehydration. For non-ambulatory patients, their family members are advised to perform gastrocnemius and soleus muscle compression from the Achilles tendon upwards; (5) pain intervention, advising patients to divert their attention, thereby increasing pain threshold and adhering to analgesics.
