# Supplementary material for: Development and Validation of a Clinical Prediction Model for Venous Thromboembolism Following Neurosurgery: A 6-Year, Multicenter, Retrospective and Prospective Diagnostic Cohort Study
Source: MDPI journal article supplement (doi:10.3390/cancers15225483), 2023-11-20
Supplement: s1 [file s1]

## Supplementary Material S2

### TRIPOD Checklist: Prediction Model Development and Validation

| Section/Topic                | Item | Checklist Item | Page                                                                                                                                                                                             |
|------------------------------|------|----------------|--------------------------------------------------------------------------------------------------------------------------------------------------------------------------------------------------|
| <b>Title and abstract</b>    |      |                |                                                                                                                                                                                                  |
| Title                        | 1    | D;V            | Identify the study as developing and/or validating a multivariable prediction model, the target population, and the outcome to be predicted.                                                     |
| Abstract                     | 2    | D;V            | Provide a summary of objectives, study design, setting, participants, sample size, predictors, outcome, statistical analysis, results, and conclusions.                                          |
| <b>Introduction</b>          |      |                |                                                                                                                                                                                                  |
| Background and objectives    | 3a   | D;V            | Explain the medical context (including whether diagnostic or prognostic) and rationale for developing or validating the multivariable prediction model, including references to existing models. |
|                              | 3b   | D;V            | Specify the objectives, including whether the study describes the development or validation of the model or both.                                                                                |
| <b>Methods</b>               |      |                |                                                                                                                                                                                                  |
| Source of data               | 4a   | D;V            | Describe the study design or source of data (e.g., randomized trial, cohort, or registry data), separately for the development and validation data sets, if applicable.                          |
|                              | 4b   | D;V            | Specify the key study dates, including start of accrual; end of accrual; and, if applicable, end of follow-up.                                                                                   |
| Participants                 | 5a   | D;V            | Specify key elements of the study setting (e.g., primary care, secondary care, general population) including number and location of centres.                                                     |
|                              | 5b   | D;V            | Describe eligibility criteria for participants.                                                                                                                                                  |
|                              | 5c   | D;V            | Give details of treatments received, if relevant.                                                                                                                                                |
| Outcome                      | 6a   | D;V            | Clearly define the outcome that is predicted by the prediction model, including how and when assessed.                                                                                           |
|                              | 6b   | D;V            | Report any actions to blind assessment of the outcome to be predicted.                                                                                                                           |
| Predictors                   | 7a   | D;V            | Clearly define all predictors used in developing or validating the multivariable prediction model, including how and when they were measured.                                                    |
|                              | 7b   | D;V            | Report any actions to blind assessment of predictors for the outcome and other predictors.                                                                                                       |
| Sample size                  | 8    | D;V            | Explain how the study size was arrived at.                                                                                                                                                       |
| Missing data                 | 9    | D;V            | Describe how missing data were handled (e.g., complete-case analysis, single imputation, multiple imputation) with details of any imputation method.                                             |
| Statistical analysis methods | 10a  | D              | Describe how predictors were handled in the analyses.                                                                                                                                            |
|                              | 10b  | D              | Specify type of model, all model-building procedures (including any predictor selection), and method for internal validation.                                                                    |
|                              | 10c  | V              | For validation, describe how the predictions were calculated.                                                                                                                                    |

|                               |     |     |                                                                                                                                                                                                       |                                                               |
|-------------------------------|-----|-----|-------------------------------------------------------------------------------------------------------------------------------------------------------------------------------------------------------|---------------------------------------------------------------|
|                               | 10d | D;V | Specify all measures used to assess model performance and, if relevant, to compare multiple models.                                                                                                   | Manuscript<br>Page 5, 6                                       |
|                               | 10e | V   | Describe any model updating (e.g., recalibration) arising from the validation, if done.                                                                                                               | No updating<br>arising from<br>the validation                 |
| Risk groups                   | 11  | D;V | Provide details on how risk groups were created, if done.                                                                                                                                             | Manuscript<br>Page 19                                         |
| Development<br>vs. validation | 12  | V   | For validation, identify any differences from the development data in setting, eligibility criteria, outcome, and predictors.                                                                         | Manuscript<br>Page 4, 5<br>Table 1                            |
| <b>Results</b>                |     |     |                                                                                                                                                                                                       |                                                               |
| Participants                  | 13a | D;V | Describe the flow of participants through the study, including the number of participants with and without the outcome and, if applicable, a summary of the follow-up time. A diagram may be helpful. | eFigure 1 in<br>the<br>Supplementary<br>Material 1            |
|                               | 13b | D;V | Describe the characteristics of the participants (basic demographics, clinical features, available predictors), including the number of participants with missing data for predictors and outcome.    | Manuscript<br>Table 1                                         |
|                               | 13c | V   | For validation, show a comparison with the development data of the distribution of important variables (demographics, predictors and outcome).                                                        | Manuscript<br>Table 1                                         |
| Model<br>development          | 14a | D   | Specify the number of participants and outcome events in each analysis.                                                                                                                               | eFigure 1 in<br>the<br>Supplementary<br>Material 1<br>Table 1 |
|                               | 14b | D   | If done, report the unadjusted association between each candidate predictor and outcome.                                                                                                              | Table 2                                                       |
| Model<br>specification        | 15a | D   | Present the full prediction model to allow predictions for individuals (i.e., all regression coefficients, and model intercept or baseline survival at a given time point).                           | VTE<br>calculator<br>website                                  |
|                               | 15b | D   | Explain how to use the prediction model.                                                                                                                                                              | Manuscript<br>Page 19                                         |
| Model<br>performance          | 16  | D;V | Report performance measures (with CIs) for the prediction model.                                                                                                                                      | Manuscript<br>Page 10                                         |
| Model-updating                | 17  | V   | If done, report the results from any model updating (i.e., model specification, model performance).                                                                                                   | No action                                                     |
| <b>Discussion</b>             |     |     |                                                                                                                                                                                                       |                                                               |
| Limitations                   | 18  | D;V | Discuss any limitations of the study (such as nonrepresentative sample, few events per predictor, missing data).                                                                                      | Page 19                                                       |
| Interpretation                | 19a | V   | For validation, discuss the results with reference to performance in the development data, and any other validation data.                                                                             | Page 18,19                                                    |
|                               | 19b | D;V | Give an overall interpretation of the results, considering objectives, limitations, results from similar studies, and other relevant evidence.                                                        | Page 17,18                                                    |
| Implications                  | 20  | D;V | Discuss the potential clinical use of the model and implications for future research.                                                                                                                 | Page 19                                                       |
| <b>Other information</b>      |     |     |                                                                                                                                                                                                       |                                                               |

|                           |    |     |                                                                                                                               |                                              |
|---------------------------|----|-----|-------------------------------------------------------------------------------------------------------------------------------|----------------------------------------------|
| Supplementary information | 21 | D;V | Provide information about the availability of supplementary resources, such as study protocol, Web calculator, and data sets. | the<br>Supplementary<br>Material 1<br>Table1 |
| Funding                   | 22 | D;V | Give the source of funding and the role of the funders for the present study.                                                 | Page 20                                      |
